# Supplementary material for: The clustering of diet, physical activity and sedentary behavior in children and adolescents: a review
Source: PubMed Central journal article supplement (PMC3904164; doi:10.1186/1479-5868-11-4), 2014-01-22
Supplement: 1479-5868-11-4-S1.pdf [file 1479-5868-11-4-S1.pdf]

**Additional file 1** Characteristics of studies included in review of clustering of diet, PA and sedentary behaviors of children and adolescents\*

| First author (year)         | Country   | Design (C/S or P) | Sample Size | Age (years) | Cluster pattern method | Diet cluster variables                                                                                                                                                                                                 | Diet assess. method | PA cluster variables                                                                                                                                                                                    | PA assess. method              | SB cluster variables                                                      | SB assess. method              | Socio-demographic variables (A/G/SES) |
|-----------------------------|-----------|-------------------|-------------|-------------|------------------------|------------------------------------------------------------------------------------------------------------------------------------------------------------------------------------------------------------------------|---------------------|---------------------------------------------------------------------------------------------------------------------------------------------------------------------------------------------------------|--------------------------------|---------------------------------------------------------------------------|--------------------------------|---------------------------------------|
| Boone-Heinonen (2008)[16] ‡ | USA       | P                 | 9,251       | 11-21       | CA (B/G)               | Diet beverages, regular beverages, juice, fruit, vegetables, low-fat foods, meat, added fat, sweets, fried food, dairy items, vitamins, fast food meals, meals/day, meals with parents, makes own decision about food. | FFQ, Q              | Housework, hobbies, skating, sports, exercise, hanging out, school clubs, school team sports, school individual sports, PE classes, sports with parents, use recreation centre, exercise to lose weight | 7-day recall Q <sup>1,2</sup>  | TV, videos, computer or video games, makes own decisions re TV            | 7-day recall Q                 | A, SES                                |
| Cameron (2011)[18]          | Australia | C/S               | 352         | 5-12        | CA                     | FV, EDNP food and drink                                                                                                                                                                                                | FFQ (PR)            | Time spent in MVPA                                                                                                                                                                                      | Accel. <sup>1,2</sup>          | Screen-time (TV,DVDs,console games, computer games, computer or internet) | Q (PR)                         | A                                     |
| Gorely (2007)[38]           | UK        | C/S               | 1,371       | 13-16       | CA (B/G)               | NA                                                                                                                                                                                                                     | NA                  | Sports/exercise, paid work/chores                                                                                                                                                                       | 4-day diary (EMA) <sup>1</sup> | TV or videos, computer use, socialising behaviors                         | 4-day diary (EMA) <sup>1</sup> | A                                     |

|                        |         |         |             |             |           |                                                                             |                            |                                                                                                                          |                               |                                                                                 |                                       |        |
|------------------------|---------|---------|-------------|-------------|-----------|-----------------------------------------------------------------------------|----------------------------|--------------------------------------------------------------------------------------------------------------------------|-------------------------------|---------------------------------------------------------------------------------|---------------------------------------|--------|
|                        |         |         |             |             |           |                                                                             |                            |                                                                                                                          |                               | (hanging out, sitting, talking, phone), homework                                |                                       |        |
| Huh (2011)[17]         | USA     | C/S     | 997         | 9.28 ±0.48  | LCA       | Salty high-fat snack foods, high-sugar snack foods, soda, fruit, vegetables | Q                          | Hard PA, team sport involvement                                                                                          | Q                             | Screen time (TV and video games)                                                | Q                                     | G, SES |
| Jago (2010)[39]        | UK      | C/S     | 761         | 10-11       | CA        | NA                                                                          | NA                         | School sports clubs at school, sports clubs outside of school, playing with friends near home, playing in home or garden | Q                             | TV viewing, using computer (excl. homework), using phone/texting, console games | Q <sup>2</sup>                        | A, G   |
| Landsberg (2010)[40] ‡ | Germany | C/S & P | 1,894 & 389 | 14 & 10-14  | CA        | 3 dietary patterns (Healthy, risk related and mixed)                        | 26-item FFQ <sup>1,2</sup> | Structured LTPA, unstructured LTPA, mode of transport to school                                                          | Q <sup>1</sup>                | Media time                                                                      | Q <sup>1</sup>                        | G, SES |
| Lui (2010)[50]         | USA     | P       | 13,339      | Grades 7-12 | LCA (B/G) | NA                                                                          | NA                         | Housework, hobbies, skating/biking, active sports, exercise                                                              | 7-day recall Q <sup>1,2</sup> | Screen time (TV, videos, computer or video games, computer)                     | 7-day recall Q <sup>1</sup> -TV only) | A, SES |

|                           |                   |     |        |                                            |             |                                                        |                               |    |                                                                                                                                                                                                                               |                                  |                                                                                                |                                             |           |
|---------------------------|-------------------|-----|--------|--------------------------------------------|-------------|--------------------------------------------------------|-------------------------------|----|-------------------------------------------------------------------------------------------------------------------------------------------------------------------------------------------------------------------------------|----------------------------------|------------------------------------------------------------------------------------------------|---------------------------------------------|-----------|
| Marshall<br>(2002)[37]    | USA &<br>UK       | C/S | 2,494  | 11-15                                      | CA<br>(B/G) | NA                                                     | NA                            | NA | Total PA (32<br>types of PA)                                                                                                                                                                                                  | SAPAC <sup>1,2</sup>             | TV, computer or<br>internet, video<br>games,<br>homework,<br>reading, sit & talk,<br>telephone | SAPAC <sup>1</sup>                          | A         |
| Mistry<br>(2009)[41]<br>‡ | USA               | C/S | 4,010  | 14.45                                      | CA<br>(B/G) | FV                                                     | Q                             | Q  | MVPA                                                                                                                                                                                                                          | Q <sup>1,2</sup>                 | NA                                                                                             | NA                                          | A, SES    |
| Nelson<br>(2005)[42]      | USA               | P   | 11,957 | Grades<br>7-12                             | CA          | NA                                                     | NA                            | NA | Housework,<br>hobbies,<br>skating/biking,<br>active sports,<br>exercise, school<br>PE, school<br>academic clubs,<br>school team<br>sports, school<br>individual sports,<br>sport with<br>parents,<br>recreation centre<br>use | 7-day<br>recall Q <sup>1,2</sup> | TV, videos,<br>computer or<br>video games,<br>computer, makes<br>own TV decisions              | 7-day<br>recall Q <sup>1-</sup><br>TV only) | A, G, SES |
| Ottevaere<br>(2011)[43]   | 10 from<br>Europe | C/S | 2,085  | (I) 12.5-<br>14.99<br><br>(II) 15-<br>17.5 | CA          | Dietary quality<br>Index for<br>Adolescents<br>(DQI-A) | 24hr<br>recall <sup>1,2</sup> | Q  | MVPA                                                                                                                                                                                                                          | IPAQ-A <sup>1,2</sup>            | Time in SB (TV,<br>computer games,<br>console games,<br>internet, internet<br>for study,       | Q <sup>1</sup>                              | A, G, SES |

|                           |                         |     |               |       |              |                                                      |                               |                                                                                             |                       |                                                                                                                                       |                  |        |
|---------------------------|-------------------------|-----|---------------|-------|--------------|------------------------------------------------------|-------------------------------|---------------------------------------------------------------------------------------------|-----------------------|---------------------------------------------------------------------------------------------------------------------------------------|------------------|--------|
| Patnode<br>(2011)[51]     | USA                     | C/S | 720           | 14.7  | LCA<br>(B/G) | NA                                                   | NA                            | MVPA weekday,<br>MVPA weekend                                                               | Accel. <sup>1,2</sup> | studying or<br>homework)                                                                                                              | Q                | A, SES |
|                           |                         |     |               |       |              |                                                      |                               | Traditional sports,<br>fitness activities,<br>other sports or<br>playing, chores or<br>work | 3DPAQ <sup>1,2</sup>  | TV, DVDs or<br>videos, video or<br>computer games,<br>internet or<br>computer,<br>talking/texting on<br>phone, reading or<br>homework |                  |        |
| Sabbe<br>(2008)[44]       | Belgium                 | C/S | 1,725         | 10    | CA           | Dietary diversity<br>index, Excess<br>index          | 19-item<br>FFQ <sup>1,2</sup> | MVPA                                                                                        | FPAQ <sup>1,2</sup>   | NA                                                                                                                                    | NA               | G, SES |
| Seghers<br>(2010)[45]     | Belgium                 | C/S | 317           | 11-12 | CA           | Healthy food<br>index, Risk<br>related food<br>index | FFQ <sup>1,2</sup>            | LTPA                                                                                        | FPAQ <sup>1,2</sup>   | LT screen-based<br>media (TV, videos<br>and recreational<br>computer,<br>console games)                                               | Q                | G      |
| te Velde<br>(2007)[46]    | 9 from<br>Europe        | C/S | 12,538        | 9-14  | CA<br>(B/G)  | NA                                                   | NA                            | Moderate-to-<br>vigorous LTPA                                                               | Q <sup>1</sup>        | TV , computer                                                                                                                         | Q <sup>1</sup>   | -      |
| Telama<br>(2005)[47]<br>‡ | Belgium<br>&<br>Finland | C/S | 1439 &<br>789 | 12-15 | CA           | NA                                                   | NA                            | Organized &<br>unorganized PA,<br>participation in<br>competitions                          | Q <sup>1,2</sup>      | Computer games,<br>TV, video                                                                                                          | Q <sup>1,2</sup> | G      |

|                                |        |     |     |       |    |                                                                                    |                |                      |                    |                                                                                    |       |      |
|--------------------------------|--------|-----|-----|-------|----|------------------------------------------------------------------------------------|----------------|----------------------|--------------------|------------------------------------------------------------------------------------|-------|------|
| Turner<br>(2011)[48]<br>‡      | Canada | C/S | 445 | 14-17 | CA | FV                                                                                 | WHO<br>STEPS Q | MVPA                 | SAPAC <sup>2</sup> | TV or videos,<br>computer or<br>internet, talking<br>with friends (incl.<br>phone) | SAPAC | A, G |
| van der<br>Sluis<br>(2010)[49] | Norway | C/S | 884 | 10-17 | CA | FV, snacks and<br>soda (chocolate,<br>candy, potato<br>chips, soda) <sup>1,2</sup> | Q              | Leisure time<br>MVPA | Q                  | TV or computer                                                                     | Q     | -    |

Abbreviations: 3DPAR, 3-day physical activity recall; 24hr, 24 hour dietary recall; A, age; accel., accelerometry; A/G, analysis stratified by age group; assess., assessment; B/G, boys and girls analyzed separately; CA, cluster analysis; C/S, cross-sectional; excl., excluding; EMA, ecological momentary assessment; EDNP, energy-dense, nutrient poor, FFQ, food frequency questionnaire; FPAQ, Flemish Physical Activity Questionnaire; FV, fruit and vegetables; G, gender; incl., including; IPAQ-A, International Physical Activity Questionnaire (7-day recall); LCA, latent class analysis; LTPA, leisure time physical activity; MVPA, moderate-to-vigorous physical activity; NA, not assessed; PA, physical activity; Q, questionnaire; PR, parental report; SAPAC, Self-administered physical activity checklist; SES, socio-economic status; P, prospective; PE, physical education; SB, sedentary behavior; WHO, World Health Organization.

<sup>1</sup>Values for reliability reported or could be found in the reference(s) provided

<sup>2</sup>Values for validity reported or could be found in the reference(s) provided

\*All studies included both boys and girls

‡Also examined other behaviors (e.g. alcohol, smoking, dieting and psychosocial behaviors)
