# Supplementary material for: The clustering of diet, physical activity and sedentary behavior in children and adolescents: a review
Source: PubMed Central journal article supplement (PMC3904164; doi:10.1186/1479-5868-11-4), 2014-01-22
Supplement: 1479-5868-11-4-S2.pdf [file 1479-5868-11-4-S2.pdf]

**Additional file 2** Associations of clustering patterns of diet, PA and sedentary behaviors with BMI or weight status in children and adolescents.

| Study [#]                                | Obesogenic patterns by behaviors examined                                                                                                                                                                                                                                                                                               | BMI or weight status <sup>†</sup>                                               | Method of analysis                 | Results        |
|------------------------------------------|-----------------------------------------------------------------------------------------------------------------------------------------------------------------------------------------------------------------------------------------------------------------------------------------------------------------------------------------|---------------------------------------------------------------------------------|------------------------------------|----------------|
| <b><i>Diet and PA</i></b>                |                                                                                                                                                                                                                                                                                                                                         |                                                                                 |                                    |                |
| [44]                                     | <u>5 clusters</u> <ol style="list-style-type: none"> <li>1. Sporty Healthy Eaters</li> <li>2. Sporty Mixed Eaters</li> <li>3. Moderate Active Healthy Eaters</li> <li>4. Unsporting Unhealthy Eaters</li> <li>5. Sedentary Healthy Eaters</li> </ol>                                                                                    | Weight status                                                                   | $\chi^2$ test stratified by gender | No association |
| <b><i>PA and sedentary behaviour</i></b> |                                                                                                                                                                                                                                                                                                                                         |                                                                                 |                                    |                |
| [39]                                     | <u>3 clusters</u> <ol style="list-style-type: none"> <li>1. High active/low sedentary</li> <li>2. Low active/moderate sedentary</li> <li>3. High active/low sedentary</li> </ol>                                                                                                                                                        | BMI z-score*                                                                    | ANOVA                              | No association |
| [37]                                     | <u>3 clusters (boys)</u> <ol style="list-style-type: none"> <li>1. Techno actives</li> <li>2. Non-socializing actives</li> <li>3. Uninvolved inactive</li> </ol><br><u>3 clusters (girls)</u> <ol style="list-style-type: none"> <li>1. Sociable actives</li> <li>2. Non-socializing actives</li> <li>3. Uninvolved inactive</li> </ol> | Weight status<br>(categorised as underweight, normal weight, overweight, obese) | $\chi^2$ test                      | No association |

|                                                |                                                                                                                                                                                                                                                                                                                                                                                                                                                                                       |                                                               |                                                                                                                         |                                                                                                                                                                                                                                                                                    |
|------------------------------------------------|---------------------------------------------------------------------------------------------------------------------------------------------------------------------------------------------------------------------------------------------------------------------------------------------------------------------------------------------------------------------------------------------------------------------------------------------------------------------------------------|---------------------------------------------------------------|-------------------------------------------------------------------------------------------------------------------------|------------------------------------------------------------------------------------------------------------------------------------------------------------------------------------------------------------------------------------------------------------------------------------|
| [51]                                           | <p><u>3 classes (boys)</u></p> <ol style="list-style-type: none"> <li>1. Active</li> <li>2. Sedentary</li> <li>3. Low media/moderate activity</li> </ol> <p><u>3 classes (girls)</u></p> <ol style="list-style-type: none"> <li>1. Active</li> <li>2. Sedentary</li> <li>3. Low media/functional activity</li> </ol>                                                                                                                                                                  | Weight status*<br>(categorised as overweight)                 | Latent multinomial logistic regression                                                                                  | A higher proportion of girls in class 2 were overweight compared to classes 1 and 3 ( $p < 0.05$ ). A higher proportion of boys in class 2 were overweight compared to class 1 ( $p < 0.05$ ).                                                                                     |
| [46]                                           | <p><u>5 clusters (boys)</u></p> <ol style="list-style-type: none"> <li>1. Healthy behavior pattern</li> <li>2. High TV viewers</li> <li>3. Mixed pattern</li> <li>4. High PC users</li> <li>5. Unhealthy behavior</li> </ol> <p><u>5 clusters (girls)</u></p> <ol style="list-style-type: none"> <li>1. Healthy behavior</li> <li>2. High TV viewers</li> <li>3. Low sedentary behavior and low physical exercise</li> <li>4. High PC users</li> <li>5. Unhealthy behavior</li> </ol> | Weight status                                                 | Sex stratified multilevel logistic regression adjusted for age. Random intercept assigned for country and school level. | Compared to cluster 1, boys in clusters 3 (OR=1.5; 95% CI: 1.18-1.90) cluster 4 (OR=1.43 ; 95% CI: 1.05-1.96) and cluster 5 OR=1.18 ; 95% CI: 1.18-2.37) and girls in cluster 2 OR=1.64 ; 95% CI: 1.23-2.18) and 4 OR=1.42 ; 95% CI: 1.00-2.01) were more likely to be overweight. |
| <b><i>Diet, PA and sedentary behaviour</i></b> |                                                                                                                                                                                                                                                                                                                                                                                                                                                                                       |                                                               |                                                                                                                         |                                                                                                                                                                                                                                                                                    |
| [16]‡                                          | <p><u>7 clusters (boys)</u></p> <ol style="list-style-type: none"> <li>1. School Clubs &amp; Sports</li> <li>2. Sports</li> <li>3. Moderately active</li> <li>4. Sedentary Behaviors</li> <li>5. Junk Food &amp; Smoke</li> </ol>                                                                                                                                                                                                                                                     | Weight status (obesity prevalence, 5 year obesity incidence)* | Sex stratified multivariate logistic regression adjusted for race, household income, parental                           | Compared to cluster 1, clusters 2, 4 and 6 were significantly associated with obesity prevalence and incidence among girls. Among boys, being in cluster 4 was inversely associated with obesity                                                                                   |

|                   |                                                                                                                                                                                                                                                                                                        |                                                                                  |                                                     |                                                                                                                                                   |
|-------------------|--------------------------------------------------------------------------------------------------------------------------------------------------------------------------------------------------------------------------------------------------------------------------------------------------------|----------------------------------------------------------------------------------|-----------------------------------------------------|---------------------------------------------------------------------------------------------------------------------------------------------------|
|                   | 6. Dieters<br>7. Low diet & activity<br><u>clusters (girls)</u><br>1. School Clubs & Sports<br>2. Average diet & Activity<br>3. High Consumer<br>4. Sedentary Behaviors<br>5. Junk Food & Low Activity<br>6. Restrictive Dieting & Smoking                                                             |                                                                                  | education, region and wave specific age and season. | prevalence but not obesity incidence, compared to cluster 1.                                                                                      |
| [18]              | <u>5 clusters</u><br>1. Young PA enthusiasts<br>2. All-round healthy behaviors<br>3. Screen-time focussed<br>4. Low on FV and PA<br>5. Energy dense eaters who watch                                                                                                                                   | BMI z-score*                                                                     | ANOVA                                               | No association                                                                                                                                    |
| [17] <sup>‡</sup> | <u>5 classes</u><br>1. High-sedentary, high-fat/high-sugar snacks, not weight conscious<br>2. High-sedentary, high-fat/high-sugar snacks, weight conscious<br>3. Dieting without exercise, weight conscious<br>4. Active, healthy eating<br>5. Low healthy, snack food, inactive, not weight conscious | Weight status*<br>(categorised as obese, overweight, healthy, underweight)       | $\chi^2$ test                                       | Higher overweight and obesity prevalence in classes 1 and 2 ( $\chi^2=279.8$ , $p<0.001$ )                                                        |
| [40] <sup>‡</sup> | <u>3 clusters</u><br>1. Low activity, low-risk behavior<br>2. High media time and high-risk behavior<br>3. High activity, high-risk behavior                                                                                                                                                           | Overweight and obesity prevalence*<br>Four year incidence of overweight/obesity* | $\chi^2$ test                                       | Four year incidence of obesity highest in cluster 1 and lowest in cluster 3 ( $p<0.05$ ).<br>No other associations were found with weight status. |

|                   |                                                                                                                                                                      |                                                                                           |                                                                       |                                                                                                               |
|-------------------|----------------------------------------------------------------------------------------------------------------------------------------------------------------------|-------------------------------------------------------------------------------------------|-----------------------------------------------------------------------|---------------------------------------------------------------------------------------------------------------|
| [43]              | <u>5 clusters</u><br>1. Unhealthy<br>2. Sedentary<br>3. Active, low diet quality<br>4. Inactive, high diet quality<br>5. Healthy                                     | Weight status*<br>(categorised as<br>underweight, normal<br>weight, overweight,<br>obese) | $\chi^2$ test stratified by<br>gender                                 | No association                                                                                                |
| [45]              | <u>4 clusters</u><br>1. Sport media-oriented mixed eaters<br>2. Academic healthy eaters<br>3. Inactive healthy eaters<br>4. Inactive media oriented unhealthy eaters | Weight status                                                                             | ANOVA stratified by<br>gender                                         | No association                                                                                                |
| [48] <sup>†</sup> | <u>3 clusters</u><br>1. Active, high screen-time users<br>2. Active, low screen-time users<br>3. Less active, least frequent drinkers                                | BMI z-scores                                                                              | ANOVA                                                                 | No association                                                                                                |
| [49]              | <u>4 clusters</u><br>1. Healthy<br>2. Quite healthy<br>3. Quite unhealthy<br>4. Unhealthy                                                                            | BMI (kg/m <sup>2</sup> )                                                                  | Linear regression<br>adjusted for gender<br>and parental<br>education | Being in cluster 4 (compared cluster 1)<br>was inversely associated with BMI ( $\beta=-$<br>1.27, $p=0.048$ ) |

Abbreviations: BMI, body mass index; CI, confidence interval; FV, fruit and vegetable; PA, physical activity;

\* Derived from measured height and weight

† Unless indicated, weight status categories included overweight (including obesity) or not overweight

‡ Also examined other behaviors (e.g. alcohol, smoking, dieting and psychological behavior)
